# Supplementary material for: Personalized chemotherapy selection for breast cancer using gene expression profiles
Source: PubMed Central journal article supplement (PMC5335706; doi:10.1038/srep43294), 2017-03-03
Supplement: srep43294-s1.pdf [file srep43294-s1.pdf]

# Personalized chemotherapy selection for breast cancer using gene expression profiles

**Authors:** Kaixian Yu<sup>1\*</sup>, Qing-Xiang Amy Sang<sup>2</sup>, Pei-Yau Lung<sup>1</sup>, Winston Tan<sup>3</sup>, Ty Lively<sup>2</sup>, Cedric Sheffield<sup>2</sup>, Mayassa J. Bou-Dargham<sup>2</sup>, Jun S. Liu<sup>4\*</sup>, Jinfeng Zhang<sup>1\*</sup>

## Supplementary materials

**Model building and evaluation.** The overall procedure of PRES is shown in Fig. S1. We first conducted a Welch two-sample t-test to find differentially expressed probes between pCR and RD response groups. Using a significance level of 0.05, the set of significant probes were selected as  $S_0$ . We then performed a Random Sampling Screening (RSS) procedure on  $S_0$  as described below to further narrow down the list of candidate probes:

1. Randomly sampling certain amount (pre-specified, in our study we use a quarter of the size of  $S_0$ ) of probes from  $S_0$  as  $C_0$ ;
2. Training a random Forest model using probes in  $C_0$  to select a relatively important (ranked by importance, the importance here is defined as area under curve change(46)) subset of probes as  $R_0^{(1)}$  (The size of  $R_0^{(1)}$  could be either predefined or determined by cross validation, in our study the latter technique was adopted);
3. Repeating (1) and (2)  $K$  times, recording all the probes that appeared in  $R_0^{(1)}, \dots, R_0^{(K)}$  as  $S_1$  (We used  $K=1000$  in our study);
4. Replacing  $S_0$  with  $S_1$ , redo (1), (2), and (3); in (3), instead of keeping all probes appeared, we now keep only the ones with occurrence rate (the ratio of times being selected and times being sampled) over 50%;
5. Repeating (4) until some iteration  $n$  where the size of  $S_n$  is either the same as  $S_{n-1}$  or smaller than a predefined number (50 as default).  $S_n$  is the final set of probes discovered by RSS.
6. Training random Forest using probes in  $S_n$  then use importance to rank the probes in  $S_n$ .

Because our datasets are unbalanced (more patients with RD than pCR), we used  $F_{0.5}$ -score, positive precision and positive recall to measure model performance.  $F_{0.5}$ -score is defined as  $(1+0.5^2) \times \text{precision} \times \text{recall} / (0.5^2 \times \text{precision} + \text{recall})$ , where precision is defined as (number of patients who are predicted to be pCR and observed to be pCR)/(number of patients who are predicted to be pCR), and recall is defined as (number of patients who are predicted to be pCR and observed to be pCR)/(number of patients who are observed to be pCR).  $F_{0.5}$ -scores were calculated from a 5-fold cross-validation, where we conducted RSS on each training fold to obtain the candidate sets:  $S_{n1}, \dots, S_{n5}$ . To select significant probes to a model and evaluate the model, we first added the probes one at a time (from highest ranked) to the clinical-model with only clinical variables (age, ER-status, HER2-status, t-stage, and n-stage). Then we recorded  $F_{0.5}$ -score along the path. The optimal number of probes for the model was chosen to be the number of probes corresponding to the maximum  $F_{0.5}$ -score for first  $N$  probes (we used  $N=30$ ).

## Simulation study

To generate simulated data, first the pCR to RD ratio was set to be 200:800 and 100:900 (pCR:RD) to mimic the situation that in the real data in which there are more RD than pCR. For the predictors, 10 informative predictors ( $X_1, \dots, X_{10}$ ) 990 non-informative predictors ( $X_{11}, \dots, X_{1000}$ ) were included, and three scenarios were considered:

1). All predictors were independent and uncorrelated, there was a mean upshift for K samples (100 or 200) and downshift for 1000-K samples for the informative predictors, but the means were 0 for all non-informative predictors, that is

$$x_{ij} \sim \begin{cases} N(0.5I_{j \leq K} - 0.5I_{j > K}, 1), & i \leq 10 \\ N(0,1) & , i > 11 \end{cases},$$

Where  $j$  represents the  $j$ th sample.

2). Like 1) but the informative predictors are correlated,

$$x_j \sim MVN(\mu, \Sigma)$$

Where  $\mu_{ij} = 0.5I_{j \leq K \text{ and } i \leq 10} - 0.5I_{j > K \text{ and } i \leq 10}$ , and  $\Sigma_{mn} = (-0.9)^{|m-n|}$  ( $\Sigma_{mn}$  is the entry on the  $m$ th row and  $n$ th column of  $\Sigma$ )

3) based on 1), but we imposed an interaction pattern:  $(X_1 + X_2) * (X_3 + X_4)$

The responses were naturally assigned as 1 or -1 (pCR or RD respectively). We compared our method with LASSO on logistic regression. 10-fold cross validation was used to evaluate the performances.

### **Cell line validation**

We collected data for 21 cell lines (some with replicates), among which 18 are paclitaxel sensitive and 3 are paclitaxel resistant (Table S17).

We used our model to predict the probabilities of these cell lines to be pCR, then test the hypothesis

$$H_0: P_{resist} = P_{sensitive}$$

$$H_1: P_{resist} < P_{sensitive},$$

where  $P_{resist}$  and  $P_{sensitive}$  represent the mean probabilities of the resistant cell lines to achieve pCR and the mean probabilities of the sensitive cell lines to achieve pCR, respectively. A Welch's two sample t-test gives the p-value 0.0108; therefore, we reject the null hypothesis. One could also tell the probabilities being pCR of the paclitaxel sensitive group is significantly higher than the ones of the paclitaxel resistant group from the boxplots (**Figure 2**) for the two groups.

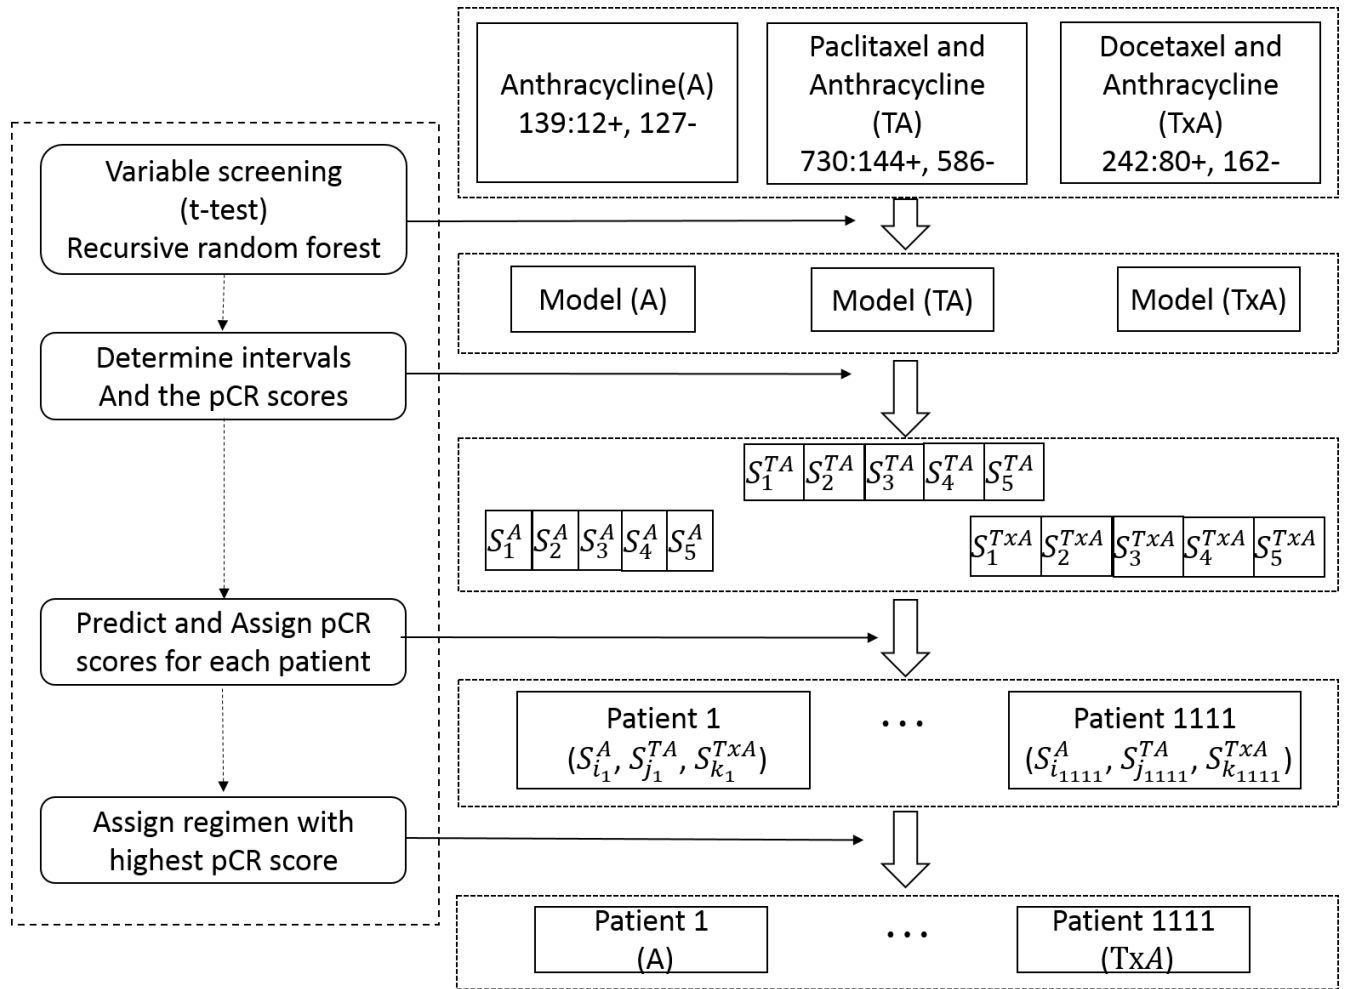

**Fig. S1.** The procedure of PRES. The numbers in the regimen boxes (i.e. 139:12+, 127-, etc.) are number of patients, patients with pCR, and patients with RD in the corresponding regimen group.

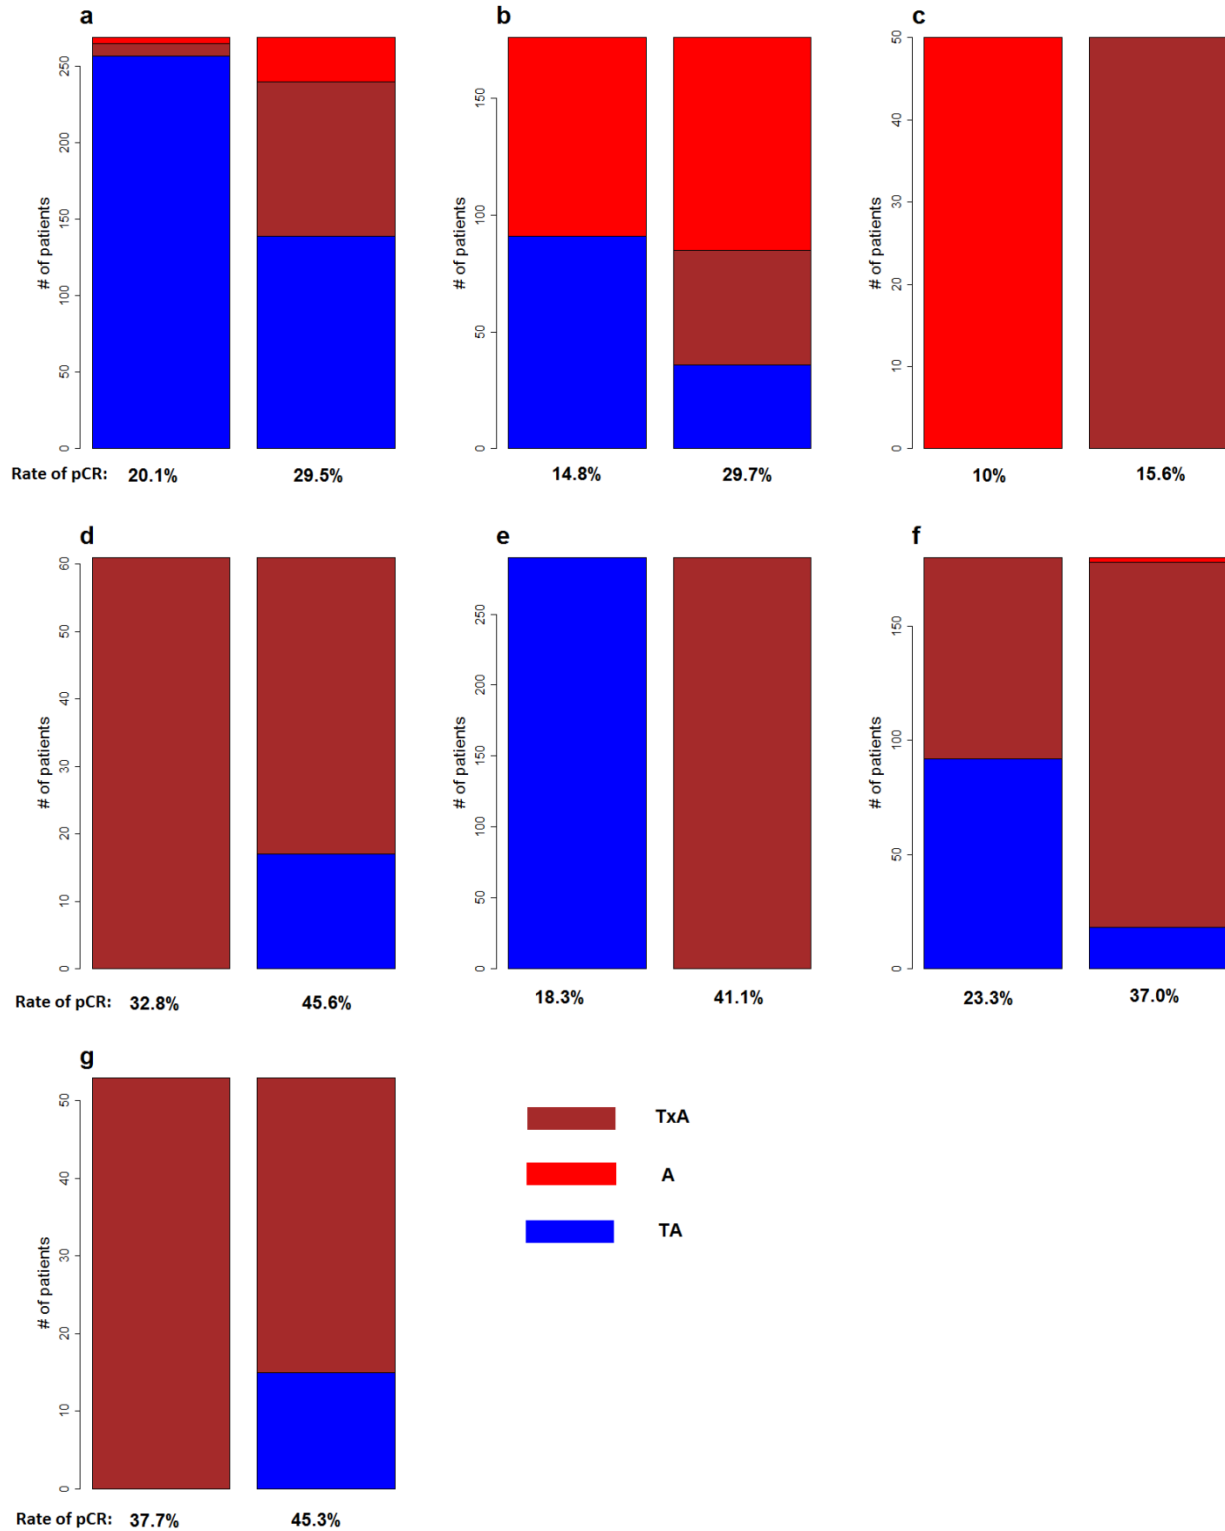

**Fig. S2.** The expected pCR and assignment for each study. **(a).** GSE20194, **(b).** GSE20271 **(c).** GSE22093, **(d).** GSE23988, **(e).** GSE25055, **(f).** GSE25065, **(g).** GSE42822. The left side of each bar plot is the original assignment, and the right side is the PRES assignment

**Table S1.** The performance of the models, based on 10-fold cross validation. Clinical-model: only clinical variables are used, clinical-gene-model: both clinical and genomic variables. A: anthracyclines only, TA: anthracycline and paclitaxel, TxA: anthracycline and docetaxel.

| Regimens | clinical-model          |           |        | clinical-gene-model     |           |        |
|----------|-------------------------|-----------|--------|-------------------------|-----------|--------|
|          | F <sub>0.5</sub> -score | Precision | Recall | F <sub>0.5</sub> -score | Precision | Recall |
| TA       | 0.457                   | 0.652     | 0.208  | 0.716                   | 0.79      | 0.522  |
| TxA      | 0.547                   | 0.565     | 0.487  | 0.891                   | 0.938     | 0.860  |
| A        | 0.367                   | 0.4       | 0.35   | 0.320                   | 0.333     | 0.278  |

**Table S2.** The simulation result for model building.

|                | Recursive Random Forest |        |                         | LASSO     |        |                         |
|----------------|-------------------------|--------|-------------------------|-----------|--------|-------------------------|
|                | pCR:RD = 200:800        |        |                         |           |        |                         |
|                | Precision               | Recall | F <sub>0.5</sub> -score | Precision | Recall | F <sub>0.5</sub> -score |
| No correlation | 0.942                   | 0.734  | 0.891                   | 0.927     | 0.824  | 0.904                   |
| Correlation    | 0.932                   | 0.814  | 0.906                   | 0.924     | 0.857  | 0.910                   |
| Interaction    | 0.857                   | 0.744  | 0.832                   | 0.838     | 0.763  | 0.822                   |
|                | pCR:RD = 100:900        |        |                         |           |        |                         |
|                | Precision               | Recall | F <sub>0.5</sub> -score | Precision | Recall | F <sub>0.5</sub> -score |
| No correlation | 0.938                   | 0.512  | 0.804                   | 0.924     | 0.696  | 0.867                   |
| Correlation    | 0.933                   | 0.813  | 0.906                   | 0.924     | 0.857  | 0.910                   |
| Interaction    | 0.855                   | 0.742  | 0.830                   | 0.837     | 0.761  | 0.821                   |

**Table S3.** Independent validation. For each regimen of one of the seven independent studies, we used all the data except the data from this study to train the model, we then test the model on this left-out study.

| Study                             | Patients(pCR rate) | F <sub>0.5</sub> -score | Precision | Reall |
|-----------------------------------|--------------------|-------------------------|-----------|-------|
| Anthracycline (A)                 |                    |                         |           |       |
| 20194                             | 4 (0)              | na                      | na        | na    |
| 20271                             | 85 (8.2%)          | 0.450                   | 1.000     | 0.143 |
| 22093                             | 50 (10%)           | 0.200                   | 0.200     | 0.200 |
| Paclitaxel and Anthracycline (TA) |                    |                         |           |       |
| 20194                             | 257 (20.6%)        | 0.791                   | 0.903     | 0.528 |
| 20271                             | 91 (20.9%)         | 0.678                   | 0.800     | 0.421 |
| 25055                             | 290 (18.3%)        | 0.681                   | 0.725     | 0.547 |
| 25065                             | 92 (20.7%)         | 0.484                   | 1.000     | 0.158 |
| Docetaxel and Anthracycline (TxA) |                    |                         |           |       |
| 20194                             | 8 (12.5%)          | na                      | Na        | Na    |
| 23988                             | 61 (32.8%)         | 0.976                   | 0.952     | 1.000 |
| 25065                             | 88 (26.1%)         | 0.759                   | 0.629     | 0.957 |
| 42822                             | 53 (37.7%)         | 0.950                   | 0.950     | 0.950 |

**Table S4.** Probability intervals and pCR scores for the three regimen groups.

| Anthracycline (A)                                                                                                                                         |               |               |               |               |               |
|-----------------------------------------------------------------------------------------------------------------------------------------------------------|---------------|---------------|---------------|---------------|---------------|
| Intervals                                                                                                                                                 | [0,0.2)       | [0.2,0.4)     | [0.4,0.6)     | [0.6, 0.8)    | [0.8,1]       |
| # of patients                                                                                                                                             | 103           | 17            | 10            | 5             | 4             |
| pCR score                                                                                                                                                 | 0.058         | 0.118         | 0.200         | 0.200         | 0.250         |
| 95%CI                                                                                                                                                     | (0.024,0.128) | (0.021,0.377) | (0.036,0.557) | (0.010,0.702) | (0.013,0.781) |
| # of patients assigned                                                                                                                                    | 340           | 15            | 32            | 20            | 7             |
| Paclitaxel and Anthracycline (TA)                                                                                                                         |               |               |               |               |               |
| Intervals                                                                                                                                                 | [0,0.2)       | [0.2,0.4)     | [0.4,0.6)     | [0.6,0.8)     | [0.8,1]       |
| # of patients                                                                                                                                             | 456           | 146           | 65            | 52            | 11            |
| pCR score                                                                                                                                                 | 0.044         | 0.212         | 0.585         | 0.846         | 1             |
| 95%CI                                                                                                                                                     | (0.027,0.069) | (0.150,0.290) | (0.455,0.704) | (0.713,0.927) | (0.678,1)*    |
| # of patients assigned                                                                                                                                    | 0             | 143           | 138           | 98            | 25            |
| Docetaxel and Anthracycline (TxA)                                                                                                                         |               |               |               |               |               |
| Intervals                                                                                                                                                 | [0,0.2)       | [0.2,0.4)     | [0.4,0.6)     | [0.6,0.8)     | [0.8,1]       |
| # of patients                                                                                                                                             | 115           | 27            | 16            | 29            | 23            |
| pCR score                                                                                                                                                 | 0.035         | 0.148         | 0.438         | 0.931         | 0.957         |
| 95%CI                                                                                                                                                     | (0.011,0.092) | (0.048,0.347) | (0.207,0.695) | (0.757,0.988) | (0.760,0.998] |
| # of patients assigned                                                                                                                                    | 0             | 126           | 76            | 48            | 11            |
| * The 95% confidence interval for TA regimen interval [0.8, 1] and TxA regimen interval [0.8, 1] are assigned conservatively using Rule of three (45,46). |               |               |               |               |               |

**Table S5.** The expected number of pCR and number of patients assigned to each regimen for the whole dataset and different stratifications. HER2-: HER2-negative, ER-: ER-negative. A: anthracycline alone regimen, TA: paclitaxel and anthracycline regimen, TxA: docetaxel and anthracycline regimen.

| Strata              | Regimens          |                                      |                                       |                          |                           |                           |                            |                       |                              |
|---------------------|-------------------|--------------------------------------|---------------------------------------|--------------------------|---------------------------|---------------------------|----------------------------|-----------------------|------------------------------|
|                     | Assignment        | Model performance for A <sup>a</sup> | # patients assigned to A <sup>b</sup> | Model performance for TA | # patients assigned to TA | Model performance for TxA | # patients assigned to TxA | # of pCR <sup>c</sup> | Rate of pCR (%) <sup>e</sup> |
| All patients (1079) | Original          | -                                    | 139 (8.6%)                            | -                        | 730 (19.7%)               | -                         | 242 (33.1%)                | 220                   | 20.4                         |
|                     | PRES <sup>d</sup> | <b>0.320 (0.333)</b>                 | <b>414</b>                            | <b>0.716 (0.79)</b>      | <b>261</b>                | <b>0.891 (0.934)</b>      | <b>404</b>                 | <b>353</b>            | <b>32.7 (29.1, 37.9)</b>     |
| HER2- (997)         | Original          | -                                    | 130 (9.23%)                           | -                        | 661 (17.6%)               | -                         | 206 (30.6%)                | 191                   | 19.2                         |
|                     | PRES              | <b>0 (0)</b>                         | <b>446</b>                            | <b>0.758 (0.817)</b>     | <b>147</b>                | <b>0.866 (0.887)</b>      | <b>404</b>                 | <b>343</b>            | <b>34.4 (31.1, 39.5)</b>     |
| HER2- & ER- (349)   | Original          | -                                    | -                                     | -                        | 251 (33.5%)               | -                         | 98 (41.8%)                 | 125                   | 35.8                         |
|                     | PRES              |                                      |                                       | <b>0.729 (0.749)</b>     | <b>56</b>                 | <b>0.802 (0.794)</b>      | <b>293</b>                 | <b>172</b>            | <b>49.2 (44.3, 56.1)</b>     |

<sup>a</sup>:  $F_{0.5}$ -scores (precision or positive predicted value for patients with predicted probability > 0.5) for clinical-gene-models.

<sup>b</sup>: number of patients originally assigned to the regimen or assigned using PRES. Numbers in parenthesis are rate of pCR.

<sup>c</sup>: Number of pCR cases observed based on the original assignment or estimated using PRES (rounded to integers).

<sup>d</sup>: Both pCR score and toxicity, if applicable, are used in regimen selection.

<sup>e</sup>: The rate of pCR. Numbers for Original are the average pCR rates for all regimens. Numbers for PRES are the expected pCR rates. Numbers in parenthesis for PRES are 95% confidence intervals.



**Table S6.** Model performance for the HER2-negative subpopulation

| Group                             | Clinical variables      |           |        | Gene and clinical variables |           |        |
|-----------------------------------|-------------------------|-----------|--------|-----------------------------|-----------|--------|
|                                   | F <sub>0.5</sub> -score | Precision | recall | F <sub>0.5</sub> -score     | Precision | recall |
| Anthracycline (A)                 | 0                       | 0         | 0      | 0                           | 0         | 0      |
| Paclitaxel and Anthracycline (TA) | 0.326                   | 0.45      | 0.155  | 0.758                       | 0.817     | 0.589  |
| Docetaxel and Anthracycline (TxA) | 0.495                   | 0.509     | 0.444  | 0.866                       | 0.887     | 0.790  |

**Table S7.** Intervals and pCR scores for HER2-negative subpopulation

| Anthracycline (A)                 |                |                |                |                |                |
|-----------------------------------|----------------|----------------|----------------|----------------|----------------|
| Interval                          | [0,0.2)        | [0.2,0.4)      | [0.4,0.6)      | [0.6,1]        | [0.8,1]        |
| Counts                            | 101            | 20             | 4              | 1              | 4              |
| pCR score                         | 0.059          | 0.200          | 0.500          | 0              | 0              |
| 95% CI                            | (0.024, 0.130) | (0.066, 0.443) | (0.150, 0.850) | (0, 0.945)     | (0, 0.604)     |
| Paclitaxel and Anthracycline (TA) |                |                |                |                |                |
| Interval                          | [0,0.2)        | [0.2,0.4)      | [0.4,0.6)      | [0.6,0.8)      | [0.8,1]        |
| Counts                            | 462            | 80             | 63             | 44             | 12             |
| pCR score                         | 0.050          | 0.213          | 0.460          | 0.818          | 0.917          |
| 95% CI                            | (0.032, 0.075) | (0.132, 0.322) | (0.335, 0.590) | (0.667, 0.913) | (0.597, 0.996) |
| Docetaxel and Anthracycline (TxA) |                |                |                |                |                |
| Interval                          | [0,0.2)        | [0.2,0.4)      | [0.4,0.6)      | [0.6,0.8)      | [0.8,1]        |
| Counts                            | 110            | 34             | 18             | 19             | 25             |
| pCR score                         | 0.045          | 0.147          | 0.611          | 0.895          | 1              |
| 95% CI                            | (0.016, 0.109) | (0.055, 0.319) | (0.361, 0.818) | (0.654, 0.982) | (0.834, 1)     |

**Table S8.** Number of patients assigned to each treatment for HER2-negative subpopulation.

| Treatment | Paclitaxel and Anthracycline (TA) | Docetaxel and Anthracycline (TxA) | Anthracycline (A) | # of pCR |
|-----------|-----------------------------------|-----------------------------------|-------------------|----------|
| Original  | 661                               | 206                               | 130               | 191*     |
| PRES      | 147                               | 404                               | 446               | 343.09   |

\*The original group is observed.

**Table S9.** Model performance for HER2-negative and ER-negative subpopulation

| Group(# of probes)                     | Clinical variables      |           |        | Gene and clinical variables |           |        |
|----------------------------------------|-------------------------|-----------|--------|-----------------------------|-----------|--------|
|                                        | F <sub>0.5</sub> -score | Precision | recall | F <sub>0.5</sub> -score     | Precision | recall |
| Paclitaxel and Anthracycline (TA) (14) | 0.357                   | 0.429     | 0.214  | 0.729                       | 0.749     | 0.660  |
| Docetaxel and Anthracycline (TxA) (2)  | 0.579                   | 0.562     | 0.659  | 0.802                       | 0.794     | 0.833  |

**Table S10.** Intervals and pCR scores for HER2-negative and ER-negative subpopulation.

| Paclitaxel and Anthracycline (TA) |                |                |                |                |                |
|-----------------------------------|----------------|----------------|----------------|----------------|----------------|
| Interval                          | [0,0.2)        | [0.2,0.4)      | [0.4,0.6)      | [0.6,0.8)      | [0.8,1]        |
| Counts                            | 102            | 62             | 34             | 38             | 15             |
| pCR score                         | 0.127          | 0.145          | 0.500          | 0.816          | 0.933          |
| 95% CI                            | (0.072, 0.212) | (0.073, 0.263) | (0.340, 0.660) | (0.651, 0.917) | (0.660, 0.997) |
| Docetaxel and Anthracycline (TxA) |                |                |                |                |                |
| Interval                          | [0,0.2)        | [0.2,0.4)      | [0.4,0.6)      | [0.6,0.8)      | [0.8,1]        |
| Counts                            | 41             | 16             | 8              | 13             | 20             |
| pCR score                         | 0.195          | 0.063          | 0.375          | 0.692          | 1              |
| 95% CI                            | (0.093, 0.354) | (0.003, 0.323) | (0.102, 0.742) | (0.388, 0.897) | (0.799, 1]     |

**Table S11.** List of all cell lines used in the validation study and their GEO accession.

| Paclitaxel sensitive |                                             |                   |                                    |
|----------------------|---------------------------------------------|-------------------|------------------------------------|
| Cell line            | GEO accession                               | Cell line         | GEO accession                      |
| <b>BT-549</b>        | GSM320598(47,48)                            | <b>CAL-851</b>    | GSM320617(47,48)                   |
| <b>HCC-1937</b>      | GSM320621(47,48)                            | <b>MDA-MB-157</b> | GSM1589152(47,48)                  |
| <b>MDA-MB-468</b>    | GSM320610(47,48)                            | <b>SUM159PT</b>   | GSM844706(49,50)                   |
| <b>BT-20</b>         | GSM320590(47,48)                            | <b>HCC-1143</b>   | GSM320631(47,48)                   |
| <b>HCC-70</b>        | GSM320625(47,48)                            | <b>MDA-MB-231</b> | GSM320604(47,48)                   |
| <b>MFM-223</b>       | GSM320634(47,48)                            | <b>HCC-1806</b>   | GSM320594(47,48)                   |
| <b>CAL-148</b>       | GSM320637(47,48)                            | <b>HCC-1395</b>   | GSM320630(47,48)                   |
| <b>HS578T</b>        | GSM320601(47,48)                            | <b>MDA-MB-436</b> | GSM320608(47,48)                   |
| <b>SUM149PT</b>      | GSM844705(49,50)                            | <b>MDA-MB-453</b> | GSM320609(47,48)                   |
| Paclitaxel resistant |                                             |                   |                                    |
| <b>CAL-120</b>       | GSM274647(48), GSM274665(48), GSM275987(48) |                   |                                    |
| <b>HDQP1</b>         | GSM276024(48)                               | <b>SW-527</b>     | GSM320640(47,48),<br>GSM276036(48) |

## Pathway analysis using Pathway interaction database (PID)

**Table S12.** A treatment using PID curated data

| Pathway Name                                               | Biomolecules in Group | P-value  |
|------------------------------------------------------------|-----------------------|----------|
| <a href="#">Caspase Cascade in Apoptosis</a>               | GZMB                  | 1.15e-02 |
| <a href="#">IL12-mediated signaling events</a>             | GZMB                  | 1.35e-02 |
| <a href="#">Downstream signaling in naïve CD8+ T cells</a> | GZMB                  | 1.43e-02 |

**Table S13.** A treatment using Reactome data

| Pathway Name                                                                        | Biomolecules in Group 1 | P-value  |
|-------------------------------------------------------------------------------------|-------------------------|----------|
| <a href="#">Activation, myristoylation of BID and translocation to mitochondria</a> | GZMB                    | 8.05e-04 |

**Table S14.** TA treatment using PID curated data.

| Pathway Name                                                                          | Biomolecules in Group | P-value  |
|---------------------------------------------------------------------------------------|-----------------------|----------|
| <a href="#">Signaling mediated by p38-gamma and p38-delta</a>                         | CCND1                 | 4.42e-03 |
| <a href="#">Validated transcriptional targets of AP1 family members Fra1 and Fra2</a> | CCND1                 | 1.48e-02 |
| <a href="#">Trk receptor signaling mediated by PI3K and PLC-gamma</a>                 | CCND1                 | 1.48e-02 |
| <a href="#">E-cadherin signaling in the nascent adherens junction</a>                 | CCND1                 | 1.60e-02 |
| <a href="#">FOXO1 transcription factor network</a>                                    | CCND1                 | 1.68e-02 |

| Pathway Name                                                                               | Biomolecules in Group | P-value  |
|--------------------------------------------------------------------------------------------|-----------------------|----------|
| <a href="#">FOXA1 transcription factor network</a>                                         | NFIB                  | 1.75e-02 |
| <a href="#">Integrin-linked kinase signaling</a>                                           | CCND1                 | 1.83e-02 |
| <a href="#">Presenilin action in Notch and Wnt signaling</a>                               | CCND1                 | 1.83e-02 |
| <a href="#">Notch signaling pathway</a>                                                    | CCND1                 | 2.31e-02 |
| <a href="#">ATF-2 transcription factor network</a>                                         | CCND1                 | 2.35e-02 |
| <a href="#">Neurotrophic factor-mediated Trk receptor signaling</a>                        | CCND1                 | 2.46e-02 |
| <a href="#">Signaling events mediated by focal adhesion kinase</a>                         | CCND1                 | 2.50e-02 |
| <a href="#">Coregulation of Androgen receptor activity</a>                                 | CCND1                 | 2.50e-02 |
| <a href="#">Regulation of retinoblastoma protein</a>                                       | CCND1                 | 2.66e-02 |
| <a href="#">Validated nuclear estrogen receptor alpha network</a>                          | CCND1                 | 2.70e-02 |
| <a href="#">Regulation of Telomerase</a>                                                   | CCND1                 | 2.74e-02 |
| <a href="#">AP-1 transcription factor network</a>                                          | CCND1                 | 2.82e-02 |
| <a href="#">Validated targets of C-MYC transcriptional repression</a>                      | CCND1                 | 2.89e-02 |
| <a href="#">Regulation of nuclear beta catenin signaling and target gene transcription</a> | CCND1                 | 3.21e-02 |
| <a href="#">C-MYB transcription factor network</a>                                         | CCND1                 | 3.40e-02 |

**Table S15.** TA treatment using Reactome data

| Pathway Name                                                          | Biomolecules in Group 1 | P-value  |
|-----------------------------------------------------------------------|-------------------------|----------|
| <a href="#">Cyclin D associated events in G1</a>                      | CCND1                   | 3.61e-03 |
| <a href="#">RNA Polymerase III Transcription Termination</a>          | NFIB                    | 7.22e-03 |
| <a href="#">RNA Polymerase III Transcription</a>                      | NFIB                    | 7.62e-03 |
| <a href="#">RNA Polymerase III Abortive And Retractive Initiation</a> | NFIB                    | 9.21e-03 |
| <a href="#">Ubiquitin-dependent degradation of Cyclin D1</a>          | CCND1                   | 1.95e-02 |

**Table S16.** TxA treatment using PID data

| Pathway Name                                       | Biomolecules in Group | P-value  |
|----------------------------------------------------|-----------------------|----------|
| <a href="#">ATR signaling pathway</a>              | MCM2, MCM7            | 3.73e-04 |
| <a href="#">Fanconi anemia pathway</a>             | USP1                  | 3.83e-02 |
| <a href="#">C-MYB transcription factor network</a> | H2AFZ                 | 6.57e-02 |

**Table S17.** TxA treatment using Reactome data

| Pathway Name                                            | Biomolecules in Group         | P-value  |
|---------------------------------------------------------|-------------------------------|----------|
| <a href="#">Assembly of the pre-replicative complex</a> | CCNL1, CDT1, MCM2, MCM6, MCM7 | 3.61e-12 |

| <b>Pathway Name</b>                                                                      | <b>Biomolecules in Group</b>  | <b>P-value</b> |
|------------------------------------------------------------------------------------------|-------------------------------|----------------|
| <a href="#"><u>Activation of the pre-replicative complex</u></a>                         | CCNL1, CDT1, MCM2, MCM6, MCM7 | 5.42e-11       |
| <a href="#"><u>DNA Replication Pre-Initiation</u></a>                                    | CCNL1, MCM2, MCM6, MCM7       | 1.73e-10       |
| <a href="#"><u>G1/S Transition</u></a>                                                   | CCNL1, MCM2, MCM6, MCM7       | 4.52e-10       |
| <a href="#"><u>Unwinding of DNA</u></a>                                                  | CCNL1, MCM2, MCM6, MCM7       | 6.78e-10       |
| <a href="#"><u>Removal of licensing factors from origins</u></a>                         | CCNL1, CDT1, MCM2, MCM6, MCM7 | 3.41e-09       |
| <a href="#"><u>Switching of origins to a post-replicative state</u></a>                  | CCNL1, MCM2, MCM6, MCM7       | 4.22e-07       |
| <a href="#"><u>Regulation of the Fanconi anemia pathway</u></a>                          | USP1                          | 1.25e-02       |
| <a href="#"><u>Association of licensing factors with the pre-replicative complex</u></a> | CDT1                          | 1.25e-02       |
| <a href="#"><u>APC/C:Cdc20 mediated degradation of Securin</u></a>                       | PTTG1                         | 6.26e-02       |
| <a href="#"><u>CDT1 association with the CDC6:ORC:origin complex</u></a>                 | CDT1                          | 6.38e-02       |
| <a href="#"><u>Orc1 removal from chromatin</u></a>                                       | CDT1                          | 7.13e-02       |
